# Supplementary material for: Autophagy regulates sex steroid hormone synthesis through lysosomal degradation of lipid droplets in human ovary and testis
Source: PubMed Central journal article supplement (PMC10220221; doi:10.1038/s41419-023-05864-3), 2023-05-26

**Fig. 1A**

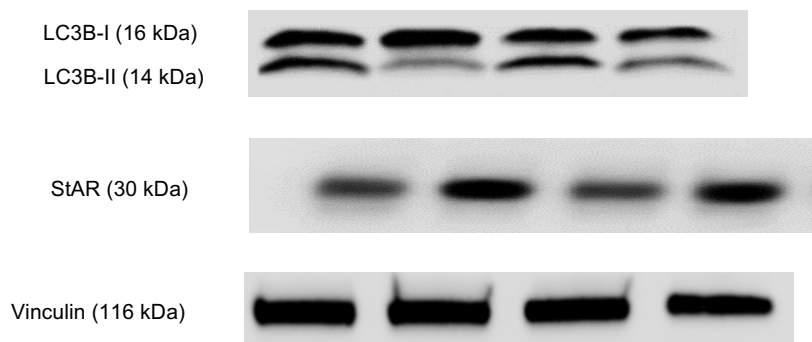

**Fig. 1D**

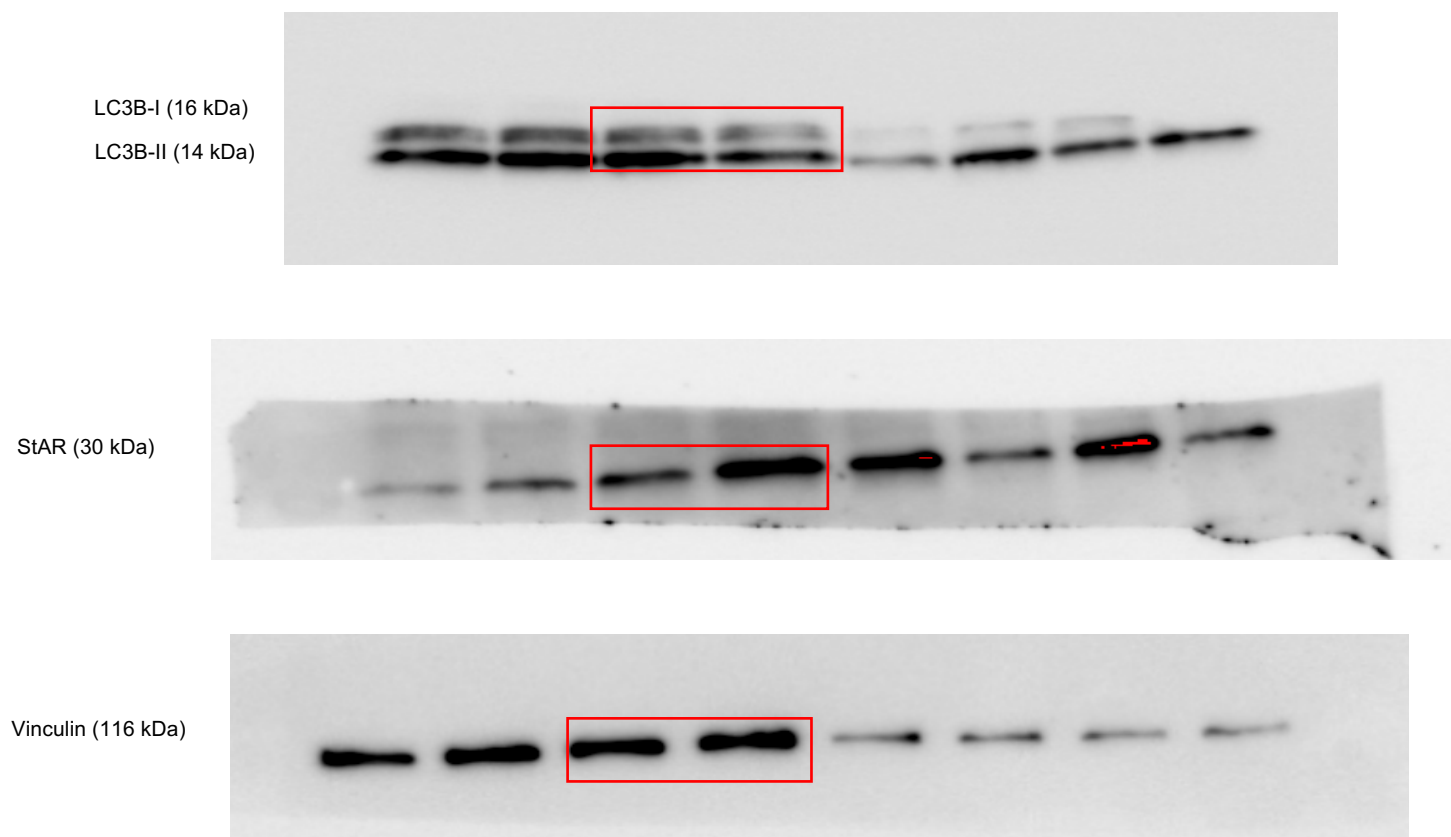

**Fig. 2A**

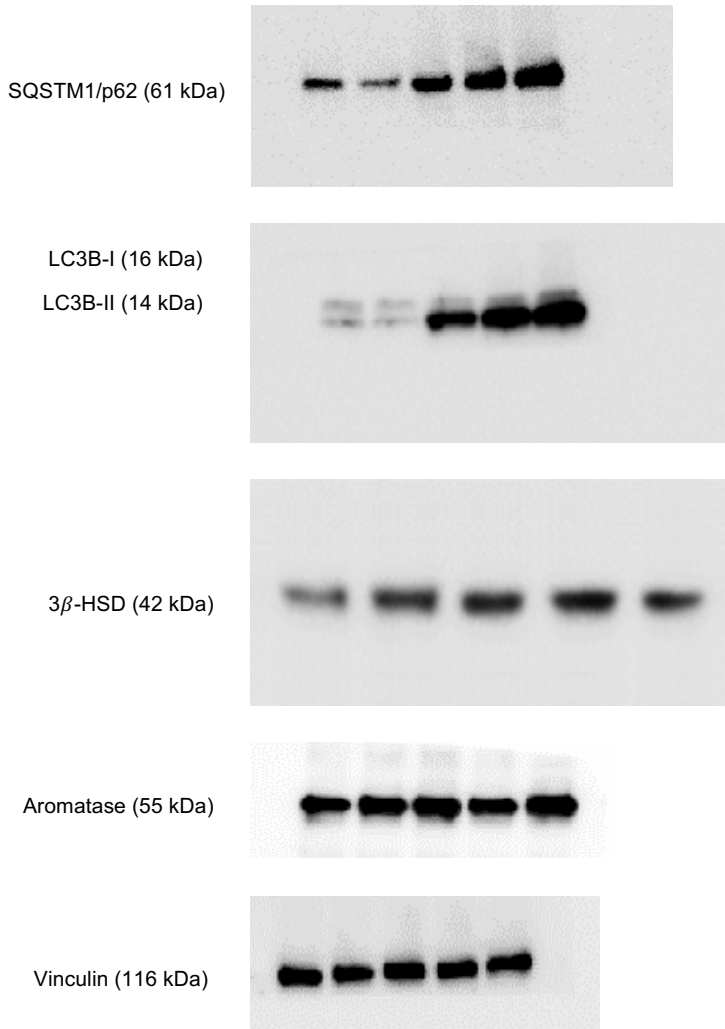

**Fig. 2E**

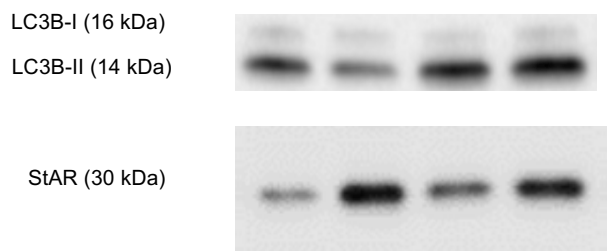

3 $\beta$ -HSD (42 kDa)

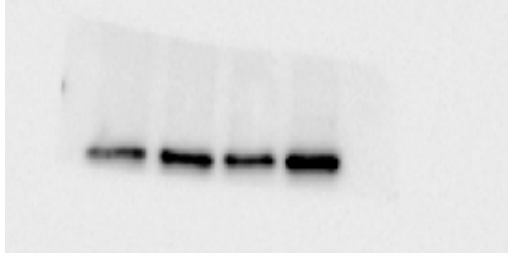

Vinculin (116 kDa)

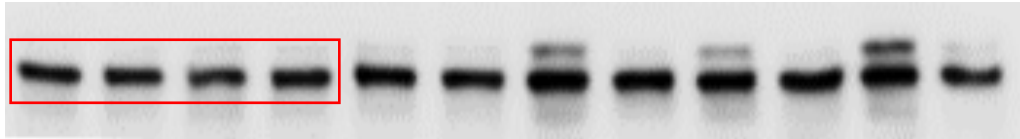

**Fig. 3A**

Scramble siRNA

Beclin1 siRNA

Beclin1 (60 kDa)

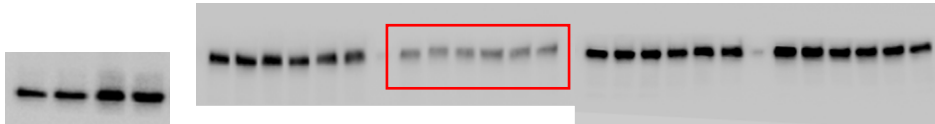

LC3B-I (16 kDa)  
LC3B-II (14 kDa)

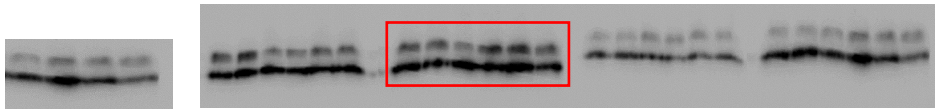

StAR (30 kDa)

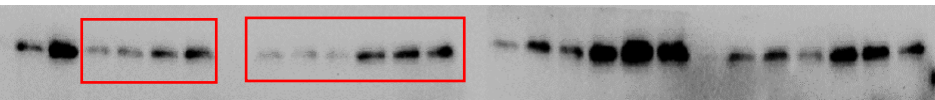

3 $\beta$ -HSD (42 kDa)

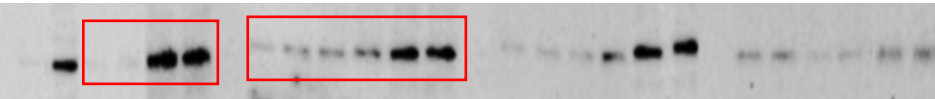

Vinculin (116 kDa)

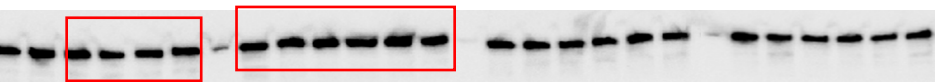

**Fig. 3C**

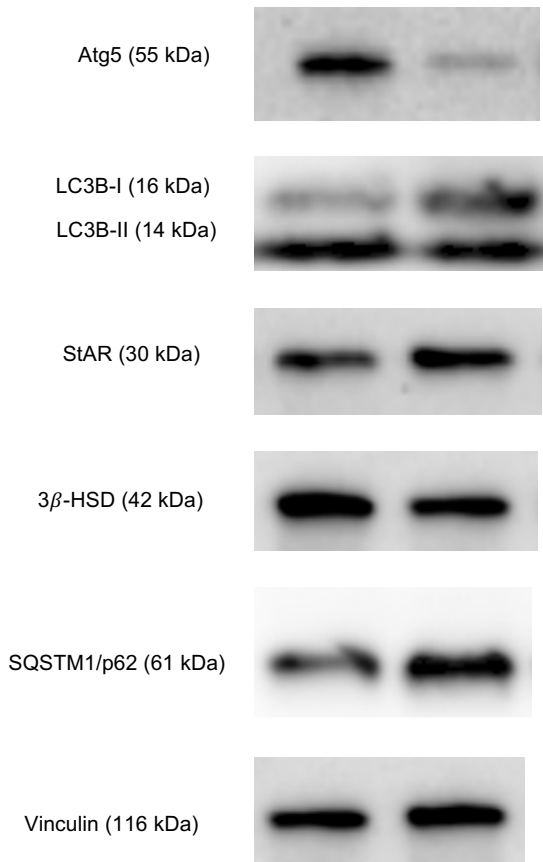

**Fig. 3E**

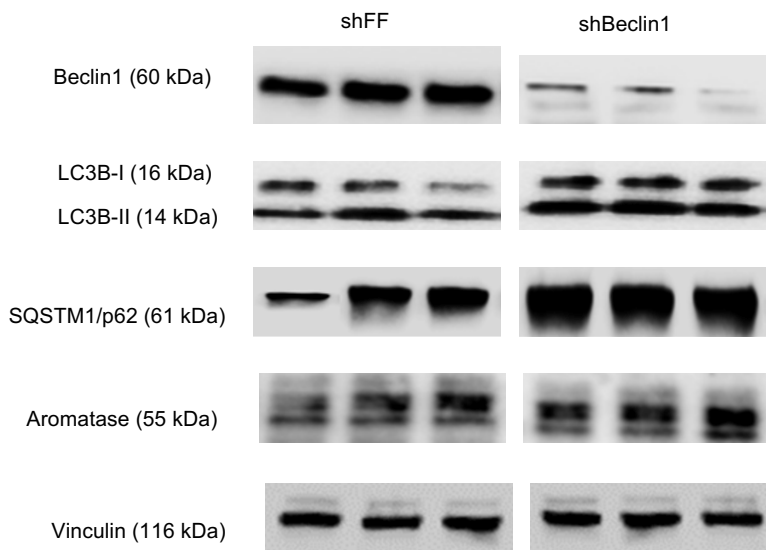



**Fig. 4B**

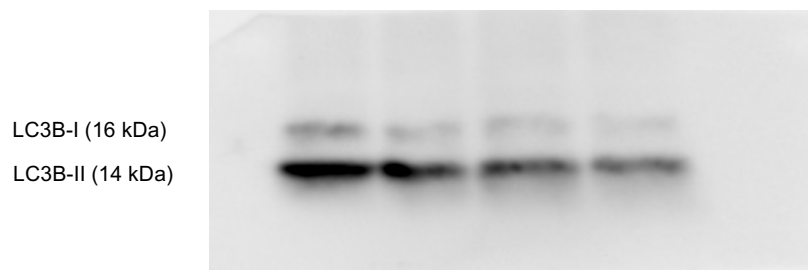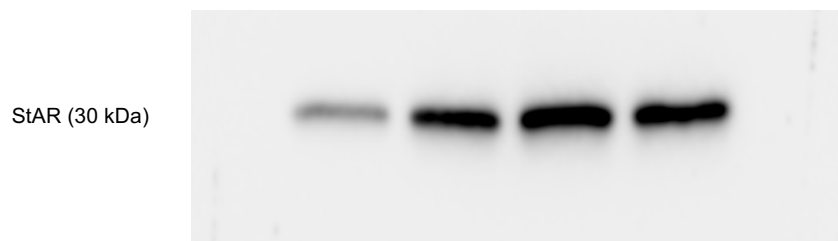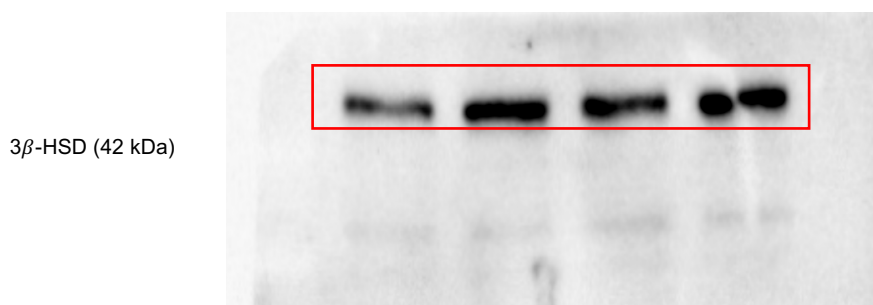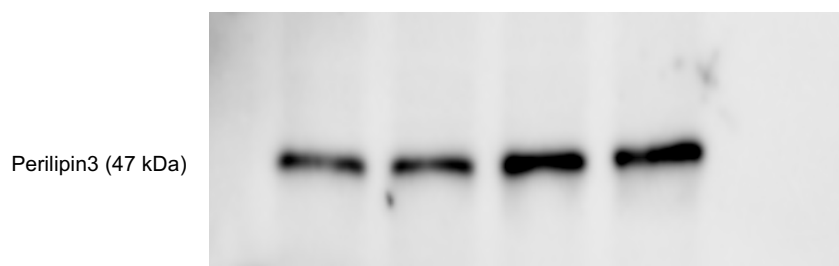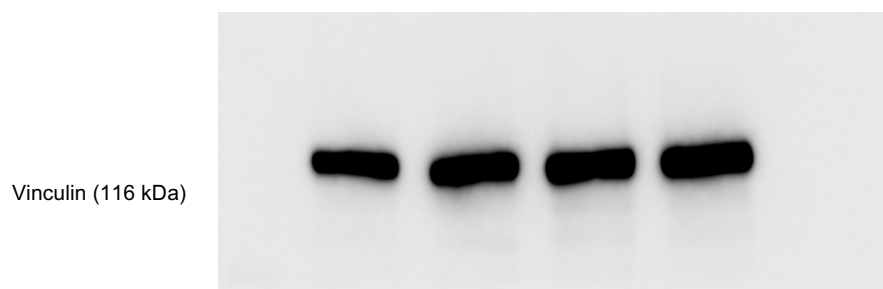

**Fig. 6C**

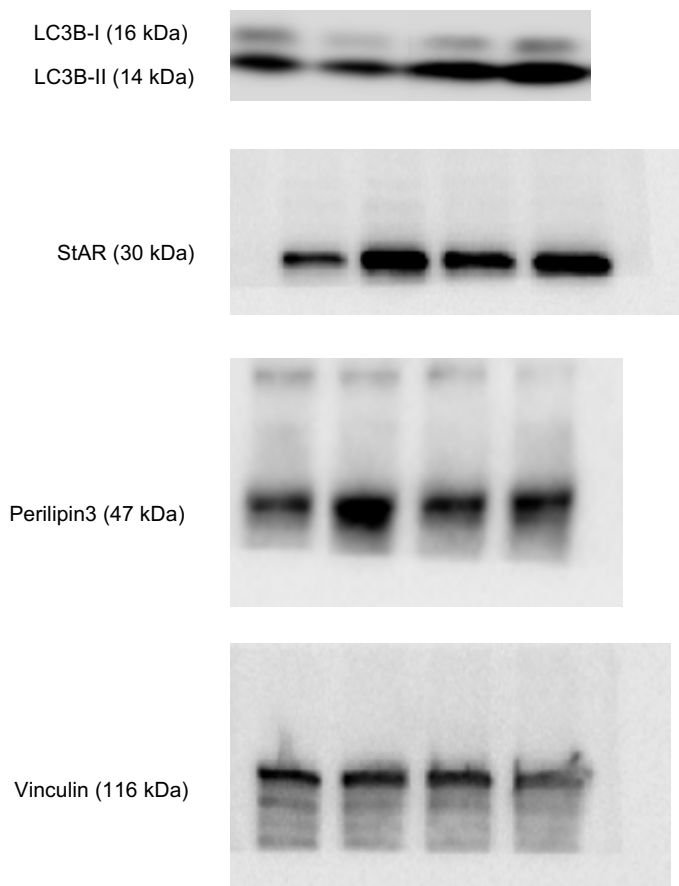

**Fig. 7B**

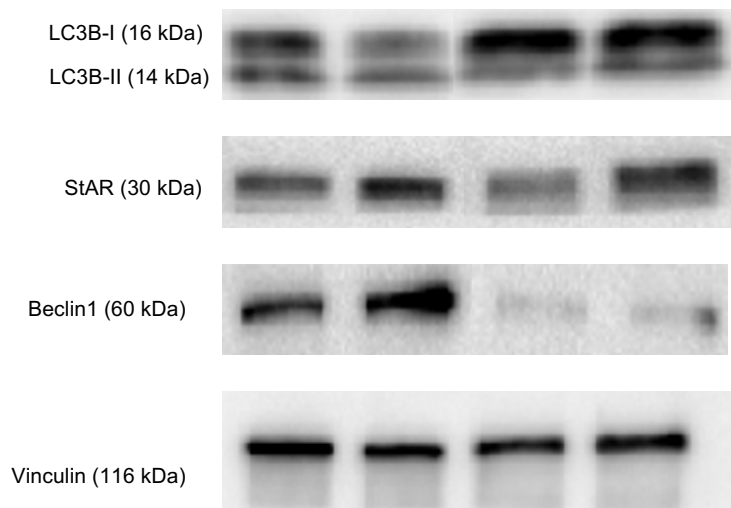

**Fig. S1A**

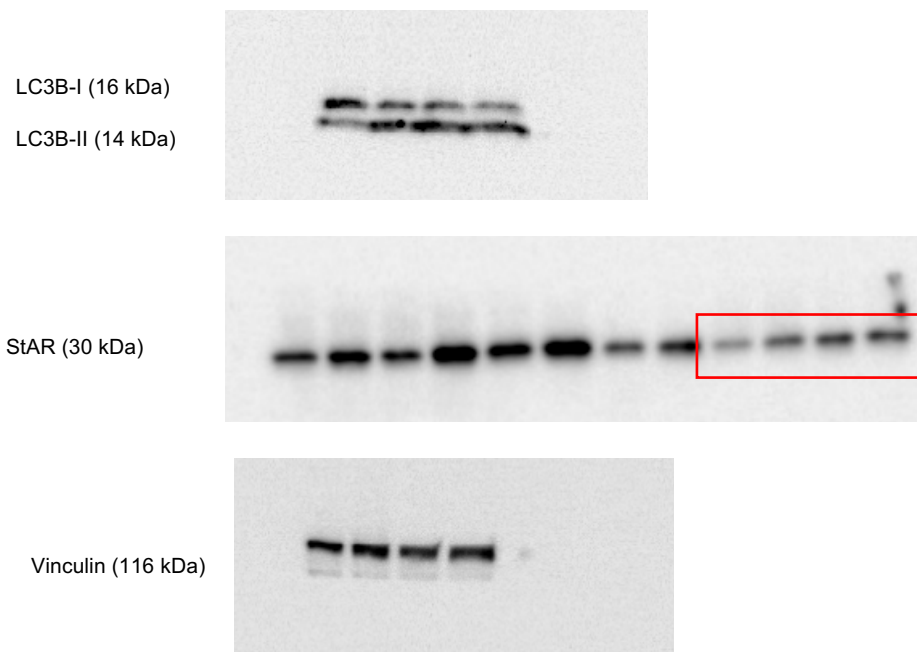

**Fig. S1D**

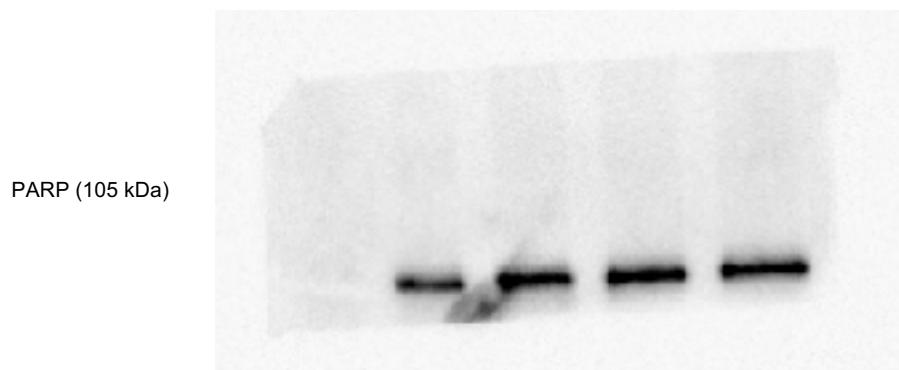

SQSTM1/p62 (61 kDa)

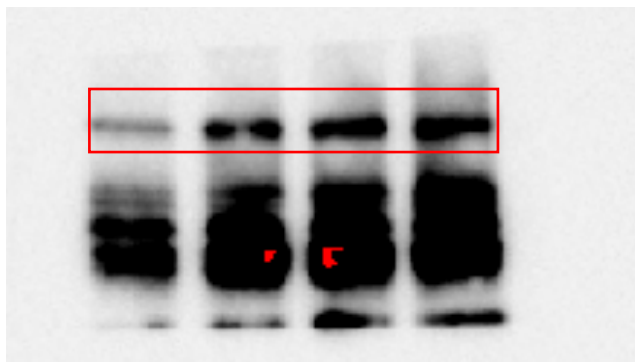

LC3B-I (16 kDa)

LC3B-II (14 kDa)

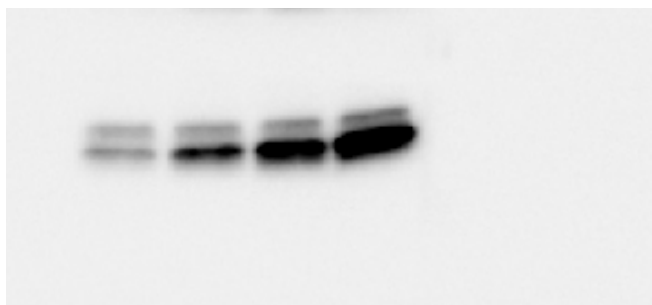

Vinculin (116 kDa)

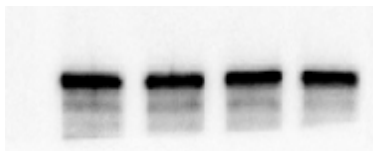

**Fig. S1H**

LC3B-I (16 kDa)

LC3B-II (14 kDa)

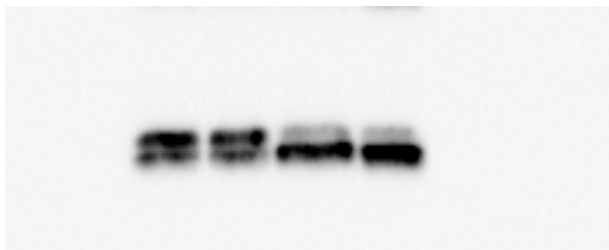

StAR (30 kDa)

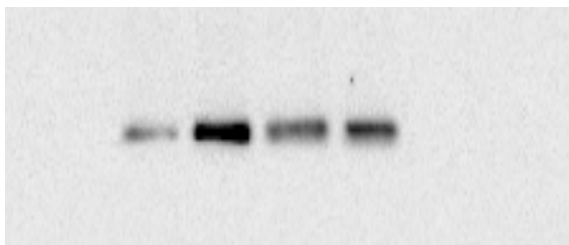

Vinculin (116 kDa)

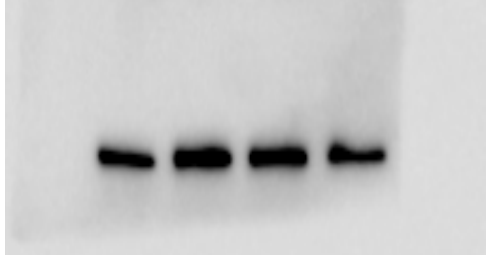

**Fig. S1J**

HMG-CoA  
Reductase (97 kDa)

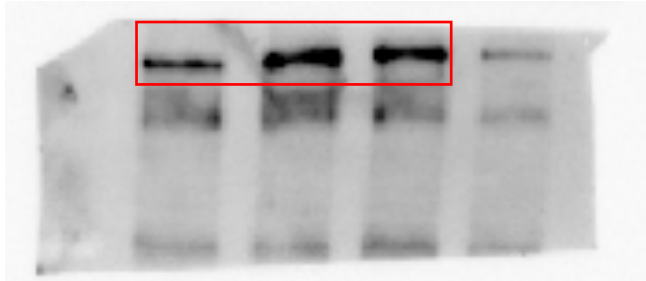

Vinculin (116 kDa)

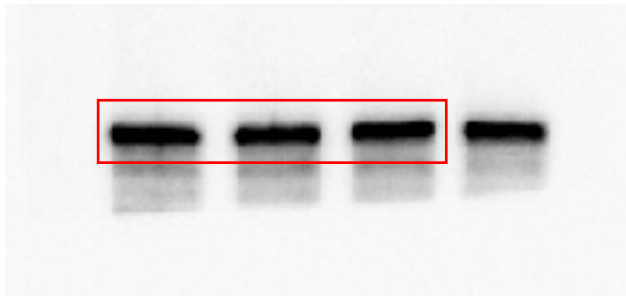

**Fig. S1K**

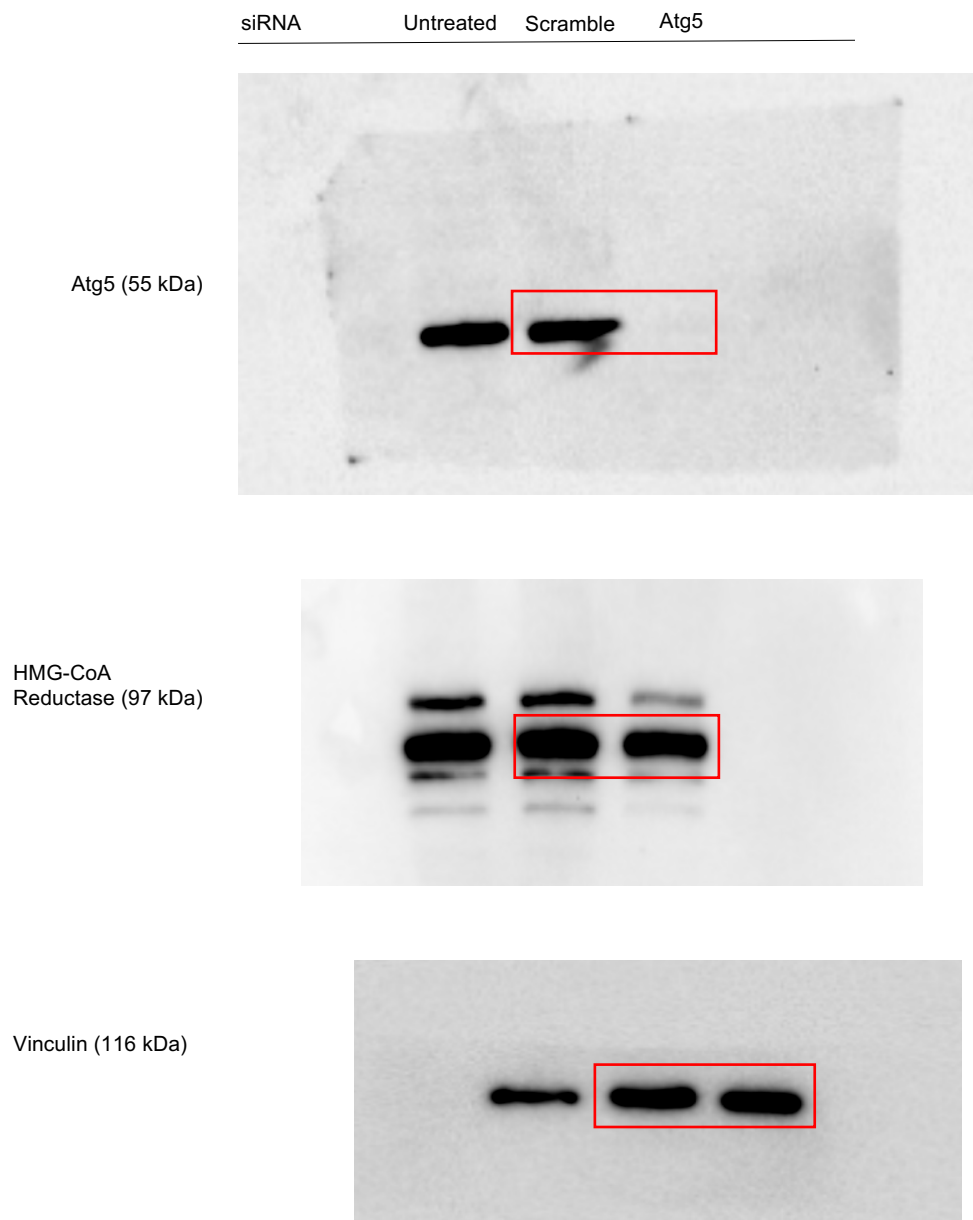

**Fig S2A**

LC3B-I (16 kDa)  
LC3B-II (14 kDa)

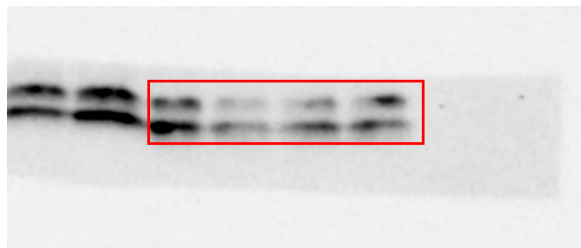

StAR (30 kDa)

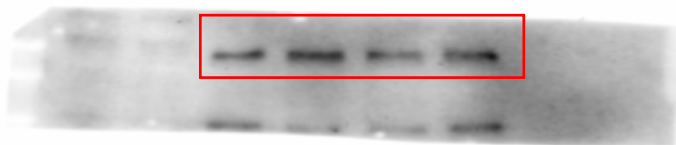

P-p70s6 kinase (70 kDa)

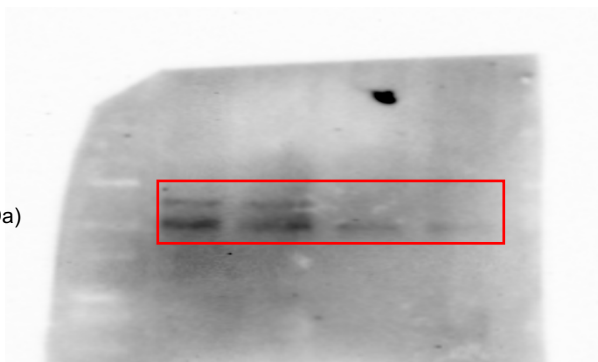

p70s6 kinase (70 kDa)

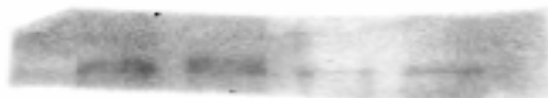

Vinculin (116 kDa)

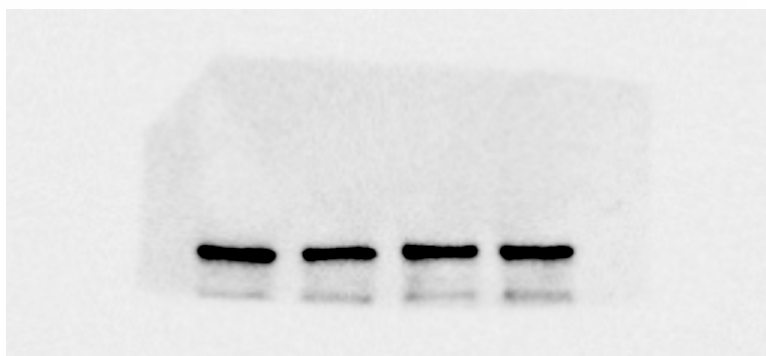

**Fig. S5A**

LC3B-I (16 kDa)  
LC3B-II (14 kDa)

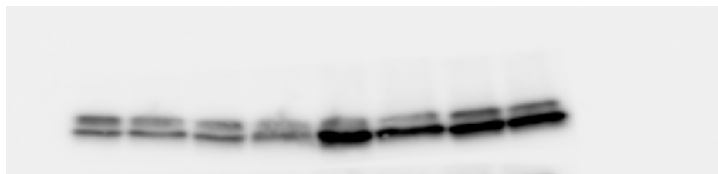

Vinculin (116 kDa)

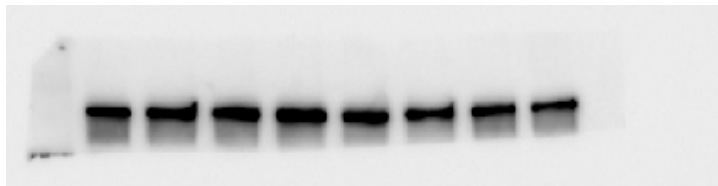

**Fig. S5C**

LC3B-I (16 kDa)  
LC3B-II (14 kDa)

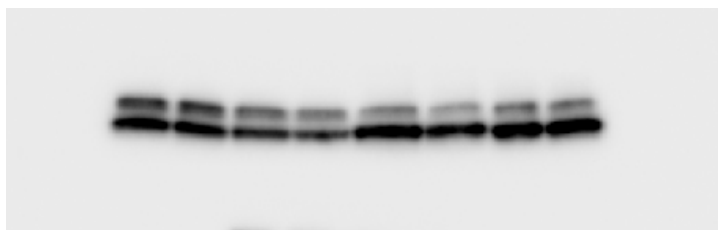

Vinculin (116 kDa)

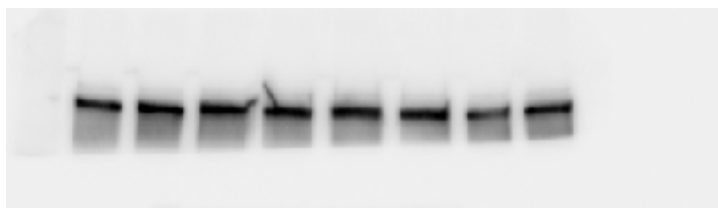

Supplement: 41419_2023_5864_MOESM15_ESM.pdf [file 41419_2023_5864_MOESM15_ESM.pdf]
